# Supplementary material
Source: Royal Society of Chemistry journal article supplement (doi:10.1039/d6nr01267a)
Supplement: d6nr01267a1.pdf [file d6nr01267a1.pdf]

## Supporting Information for

# **Silica nanoparticle-reinforced cellulose aerogels with enhanced thermal stability for efficient thermal insulation**

Miao Liu <sup>a</sup>, Qiao Wang <sup>a</sup>, Ruliang Li <sup>b</sup>, Shaoqian Zhang <sup>a</sup>, Zhiyu Huo <sup>a</sup>,  
Yikai Zhu <sup>a</sup>, Zhi Li <sup>a</sup>, Xiaoxu Wu <sup>a</sup>, Shuai Li <sup>a\*</sup>

<sup>a</sup> *School of Resources and Safety Engineering, Central South University, 410083  
Changsha, P.R. China*

<sup>b</sup> *Xiandai Investment Co.,Ltd. Changsha Branch, 410208 Changsha, P.R. China*

### **Corresponding authors**

Shuai Li, E-mail: [shuaige@csu.edu.cn](mailto:shuaige@csu.edu.cn)

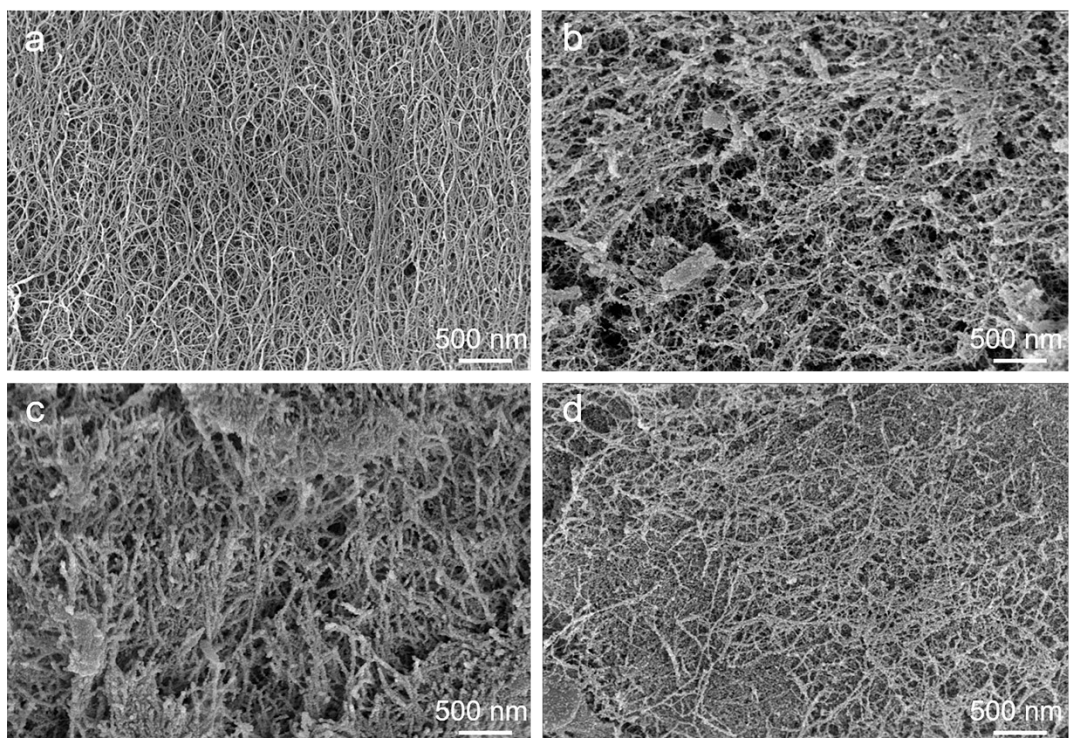

Fig. S1. SEM images of PTCNF and PTCNF/Si composite aerogels: (a) PTCNF, (b) PTCNF/Si-0.5, (c) PTCNF/Si-1.0, (d) PTCNF/Si-1.5

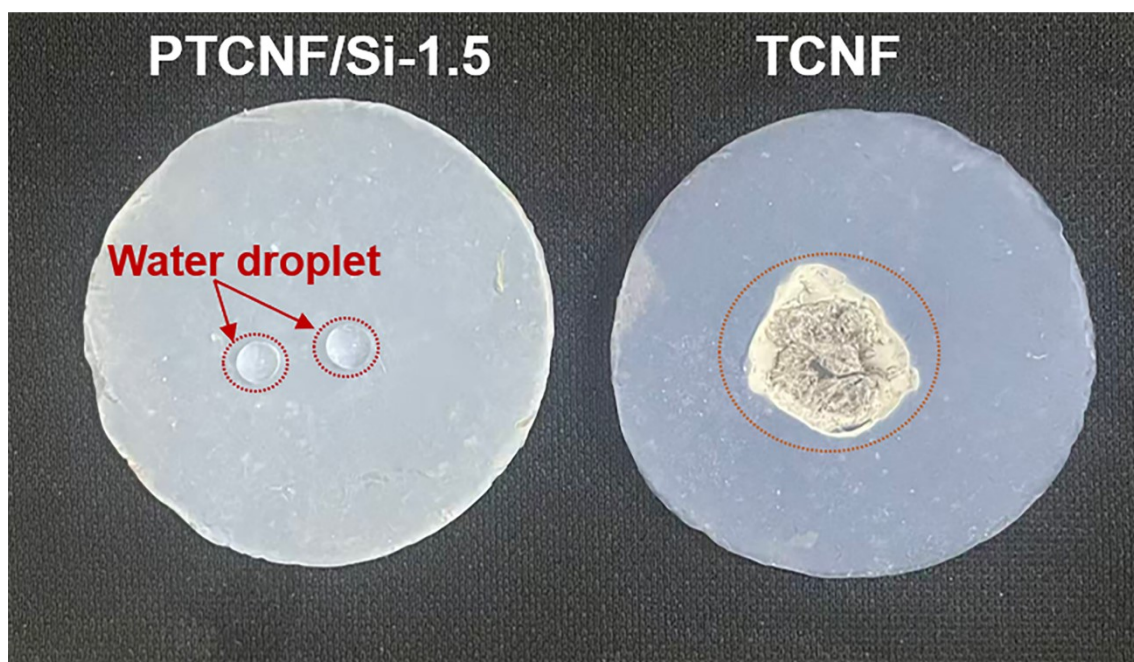

Fig. S2. Digital photographs of water droplets on TCNF and PTCNF/Si-1.5 surfaces
